# Supplementary material for: FXR, a Key Regulator of Lipid Metabolism, Is Inhibited by ER Stress-Mediated Activation of JNK and p38 MAPK in Large Yellow Croakers (Larimichthys crocea) Fed High Fat Diets
Source: MDPI journal article supplement (doi:10.3390/nu13124343), 2021-12-01
Supplement: s1 [file s1]

**Table S1.** Formulation and proximate analysis of the experimental diets <sup>1</sup>.

| Ingredients g/kg                     | Diets   |      |              |              |
|--------------------------------------|---------|------|--------------|--------------|
|                                      | Control | HFD  | HFD-CDCA 300 | HFD-CDCA 900 |
| Fish meal                            | 390     | 390  | 390          | 390          |
| Soybean meal                         | 200     | 200  | 200          | 200          |
| Wheat meal                           | 230     | 230  | 230          | 230          |
| Wheat starch                         | 60      | 60   | 60           | 60           |
| Fish oil                             | 60      | 120  | 120          | 120          |
| Soybean lecithin                     | 15      | 15   | 15           | 15           |
| Vitamin premix <sup>2</sup>          | 20      | 20   | 20           | 20           |
| Mineral premix <sup>3</sup>          | 20      | 20   | 20           | 20           |
| Attractant <sup>4</sup>              | 3       | 3    | 3            | 3            |
| Mold inhibitor <sup>5</sup>          | 1       | 1    | 1            | 1            |
| CDCA                                 |         |      | 0.3          | 0.9          |
| Proximate composition (% dry matter) |         |      |              |              |
| Crude protein                        | 45.2    | 45.5 | 45.1         | 45.4         |
| Crude lipid                          | 11.5    | 17.9 | 17.1         | 17.7         |

<sup>1</sup> CDCA, chenodeoxycholic acid; HFD, high-fat diet; HFD-CDCA300, high-fat diet supplemented with 300 mg/kg CDCA; HFD-CDCA 900, high-fat diet supplemented with 900 mg/kg CDCA.

<sup>2</sup>Vitamin premix (mg or g/kg diet): cholecalciferol, 5 mg; retinol acetate, 32 mg; thiamin 25 mg; cyanocobalamin, 10 mg; riboflavin, 45 mg; pyridoxine HCl, 20 mg; ascorbic acid, 2000 mg; alpha-tocopherol (50%), 240 mg; menadione, 10 mg; pantothenic acid, 60 mg; inositol, 800 mg; niacin acid, 200 mg; folic acid, 20 mg; biotin (2%), 60 mg; choline chloride (50%), 4000 mg; microcrystalline cellulose, 12.47 g. <sup>3</sup>Mineral premix (mg or g/kg diet): CuSO<sub>4</sub>·5H<sub>2</sub>O, 10 mg; Ca (IO<sub>3</sub>)<sub>2</sub>·6H<sub>2</sub>O (1%), 60 mg; CoCl<sub>2</sub>·6H<sub>2</sub>O (1%), 50 mg; FeSO<sub>4</sub>·H<sub>2</sub>O, 80 mg; MgSO<sub>4</sub>·7H<sub>2</sub>O, 1200 mg; MnSO<sub>4</sub>·H<sub>2</sub>O, 45 mg; NaSeSO<sub>3</sub>·5H<sub>2</sub>O (1%), 20 mg; ZnSO<sub>4</sub>·H<sub>2</sub>O, 50 mg; CaH<sub>2</sub>PO<sub>4</sub>·H<sub>2</sub>O, 10 g; Zeolite, 8.485 g. <sup>4</sup>Attractants: glycine and betaine <sup>5</sup>Mold inhibitor: contained 50% calcium propionic acid and 50% fumaric acid.

**Table S2.** Primers used for qPCR analysis <sup>1</sup>.

| Genes          | Forward Sequences (5'–3')     | Reverse Sequences (5'–3')     | Accession No.  |
|----------------|-------------------------------|-------------------------------|----------------|
| <i>atgl</i>    | CCATGCATCCGTCCTTCAACC         | GAGATCCCTAACCGCCCACT          | GQ372967.1     |
| <i>apob100</i> | AGAGTGTTGTCCAGGATAAA<br>GATGC | CAGGGCTCAGGGTCTCAGTC          | XM_027284282.1 |
| <i>atf4</i>    | GCCGTTATTCTGCTCCATCTT<br>CT   | AGACCTTACCCTGAGCCCACAT        | XM_019253810.2 |
| <i>atf6</i>    | CAGATAATAAGGAGGCTGAG<br>AGTGC | CGTAGGTATGATGAGGTGCGTA<br>GT  | XM_010730227.3 |
| <i>bsep</i>    | TGATGGCGGCGGGTAGTTT           | GCAGCAGTGTAGTTCCTCTTCC        | XM_027291804.1 |
| <i>cd36</i>    | GAGCATGATGGAAAATGGTT<br>CAAAG | GAGCATGATGGAAAATGGTTCA<br>AAG | KM593122.1     |
| <i>chop</i>    | TCTGGATGTTCTGGAGAGTTG<br>TTC  | AGGATGATGATGAGGTGTGATG<br>C   | XM_010732112.3 |
| <i>cpt1</i>    | TGGGTGCTGGTGGCGGATTT          | GGGCTGGAGAACTTGCTGGAGA        | XM_019255573.2 |
| <i>EIF2A</i>   | ATGCCGGGGCTCAGCTGTC           | CTAGTCCTCTGCTTTGGCCTCC        | XM_019277014.2 |
| <i>fas</i>     | ACTCCTATGTGGCAGCATAGA<br>C    | GTTTCAGCCTCAGACTCTTTGCC       | KP889061.1     |
| <i>fxr</i>     | TGGAGGAAAGGATACGCAAG<br>AGTG  | TGTCAGGATGGTTACGGTGGTG        | XM_010737684   |

|                |                               |                              |                |
|----------------|-------------------------------|------------------------------|----------------|
| <i>gapdh</i>   | GACAACGAGTTCGGATACAG<br>C     | CAGTTGATTGGCTTGTTTGG         | XM_010743420.3 |
| <i>grp78</i>   | GGTGGCGATGACAAGCAAAC          | CTGAGAACAGCAGCAACAAGC        | XM_010738795.3 |
| <i>lxra</i>    | TCTCAAAAGGAATGAACGAC          | TAAGGTTGCTGTAGCCTCTCA        | XM_019273432.2 |
| <i>ldlr</i>    | ACATAAGCGCCGGTGCTGTT          | TACGATGTCCTCTGGCTGATTC       | KM593127.1     |
| <i>mtp</i>     | ATGTCCAAAATGTTCTCCATG<br>TCTG | ATGTCAATAGCCAACCCTCCTTG      | KP027412.1     |
| <i>ppara</i>   | GTCAAGCAGATCCACGAAGC<br>C     | TGGTCTTTCCAGTGAGTATGAGC<br>C | XM_027291871.1 |
| <i>scd1</i>    | ACAAGCTCTCCGTGGTGGTCA<br>T    | GCCAGGTAGCGTTCAGCAACAT       | KP202157.1     |
| <i>shp</i>     | GCGACGGACAGTGTGCTTGA<br>A     | ACTGGTCGTTTGGTGGCATCTG       | KY745777.1     |
| <i>srebp1</i>  | CCAAGACAGAGGAGTGCGAG<br>AC    | TCATTTGCTGGCAGTCGTGGAG       | KP342262.1     |
| <i>xbp1s</i>   | GTCTTCTGAGTCCGCAGCAGG<br>TG   | AGGATGTCCAGAATGCCCAGTA<br>G  | XM_019264508.2 |
| <i>β-actin</i> | CTACGAGGGTTATGCCCTGCC         | TGAAGGAGTAACCGCGCTCTG        | GQ168793.1     |

---

<sup>1</sup> *atgl*, adipose triglyceride lipase; *apob100*, Apolipoprotein B100; *atf4*, activating transcription factor 4; *atf6*, activating transcription factor 6; *bsep*, bile salt export pump; *chop*, C/EBP homologous protein; *cpt1*, carnitine palmitoyltransferase I; *eif2α*, eukaryotic initiation factor 2α; *fas*, fatty acid synthase; *fxr*, farnesoid X receptor; *gapdh*, glyceraldehyde-3-phosphate

dehydrogenase; *grp78*, glucose-regulated protein 78; *lxra*, liver X receptor  $\alpha$ ; *ldlr*, low density lipoprotein receptor; *mtp*, microsomal triglyceride transfer protein; *ppara*, proliferator-activated receptor  $\alpha$ ; *scd1*, stearyl-CoA desaturase 1; *shp*, small heterodimer partner; *srebp1*, sterol regulatory element binding protein 1; *xbp1s*, X-box-binding protein 1.

**Table S3.** Primers used for plasmid construction <sup>1</sup>.

| Primers           | Forward Sequences (5'–3')              | Reverse Sequences (5'–3')               |
|-------------------|----------------------------------------|-----------------------------------------|
| pGL-SREBP1        | GGGGTACCAGGTAAAGTATGGTTG<br>CCAGGTAA   | CCGCTCGAGCTTTACTCCTGTGTGCGG             |
| pGL-PPAR $\alpha$ | CCCTCGAGGGCAGCAGCAGCAATC<br>GTCATCGT   | CCAAGCTTTGTCTGTCAGCGGAGTCAGGTGT<br>TCT  |
| pGL-ATGL          | GGGGTACCGCCTCTGCTCTGCTTAC<br>TTCCTTGTG | CCGCTCGAGCGAAGGAGATGTTCCACGGCG<br>AGTCT |

<sup>1</sup> sterol regulatory element binding protein 1; PPAR $\alpha$ , proliferator-activated receptor  $\alpha$ ; ATGL, adipose triglyceride lipase.

A

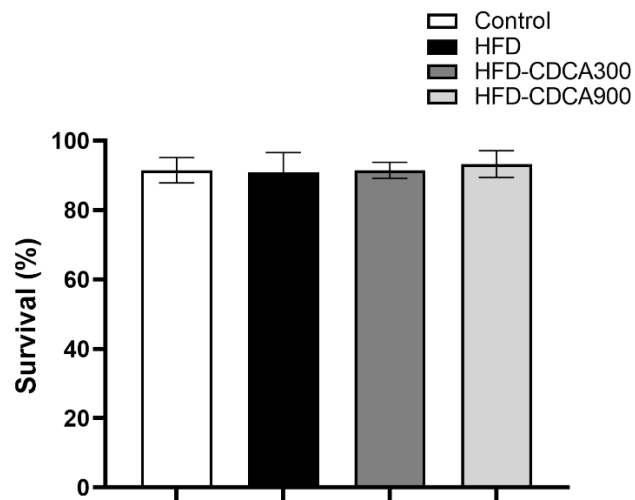

B

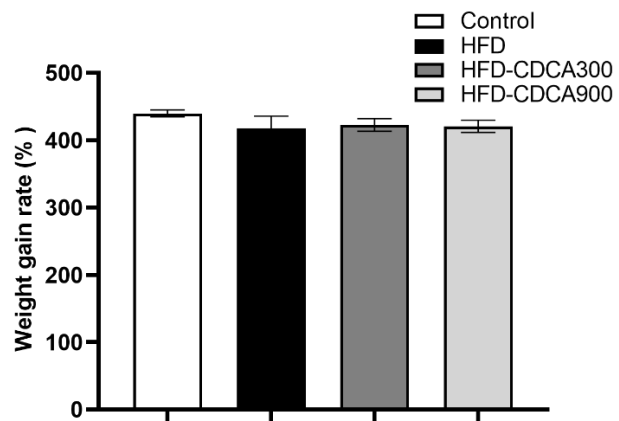

**Figure S1.** Effects of HFD and supplementation of CDCA on the survival (**A**) and weight gain rate (**B**) of large yellow croakers. Data are shown as means  $\pm$  SEMs ( $n = 3$ ) and were analyzed using Duncan's multiple range test. Labeled means without a common letter differ,  $p < 0.05$ .

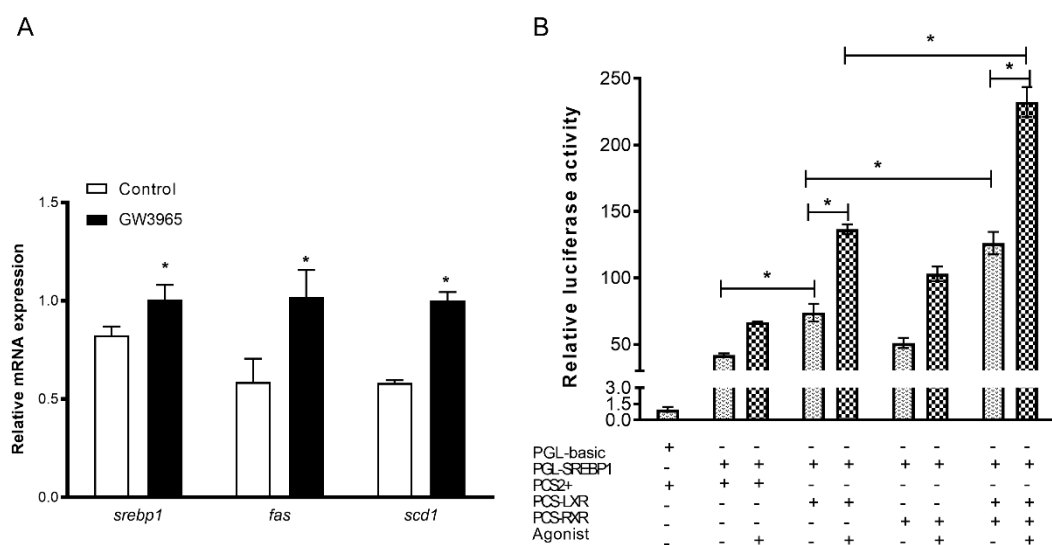

**Figure S2.** Effects of LXR $\alpha$  on the expression of *srebp1* and other lipogenesis related genes. **(A)** Effects of GW3965 (LXR $\alpha$  agonist) treatment on expression of *srebp1*, *fas* and *scd1* in cells of large yellow croaker. **(B)** Effects of GW3965 and croaker LXR $\alpha$  overexpression on the promoter activity of SREBP1 in HEK 293T. Data are shown as means  $\pm$  SEMs ( $n = 3$ ) and were analyzed using Student's t-test, \*  $p < 0.05$ .
